# Supplementary material
Source: PubMed Central journal article supplement (PMC3690984)
Supplement: supp_mct093_mct093supp.pdf [file supp_mct093_mct093supp.pdf]

**Figure S1**

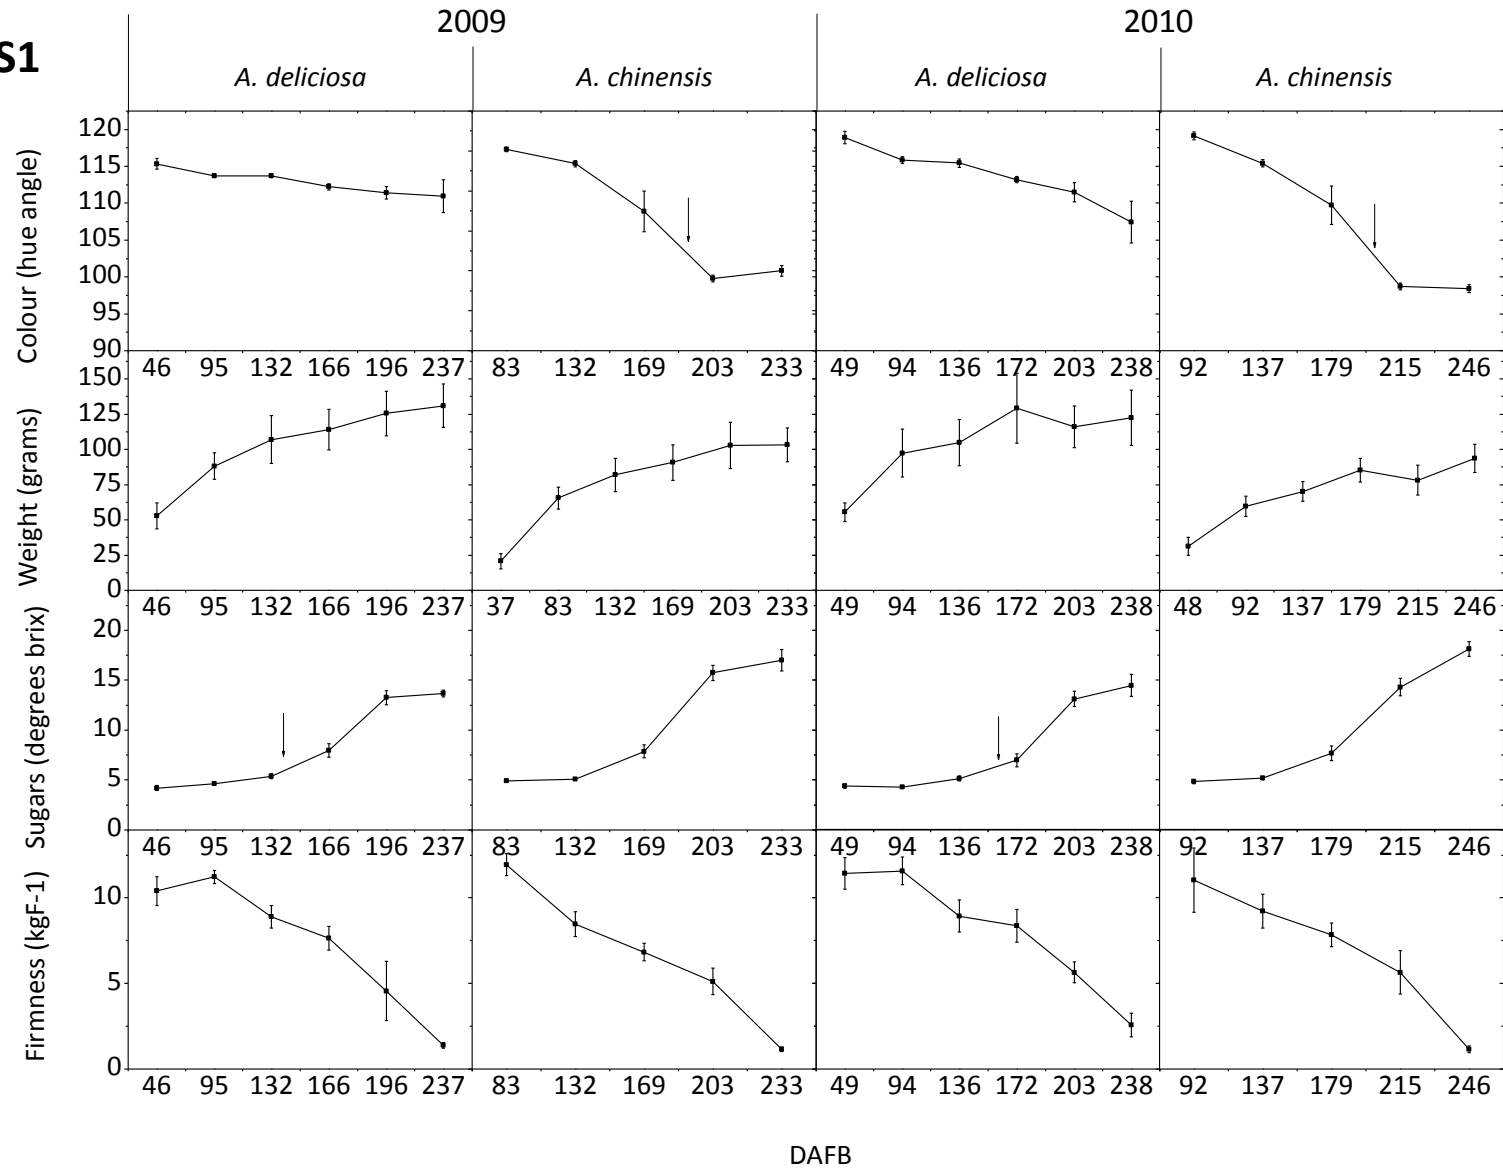

**Figure S1. Colour, soluble sugars, weight and firmness of *A. chinensis* and *A. deliciosa* fruit over development in 2009 and 2010.** Colour is measured as hue angle, where a hue angle below 100° is yellow, a hue between 100° and 110° is green/yellow, and a hue above 110° is green. Soluble sugars are measured in °Brix, weight is measured in grams, and firmness is measured in kgF. Measurements are given for *A. deliciosa* (left panels) and *A. chinensis* (right panels) over fruit development (DAFB) in 2009 (right) and 2010 (left). Arrows indicate commercial harvest points as determined by maturity standards for soluble sugar levels in *A. deliciosa* and colour measurements in *A. chinensis*. Error bars indicate standard deviation (n=10).

Figure S2

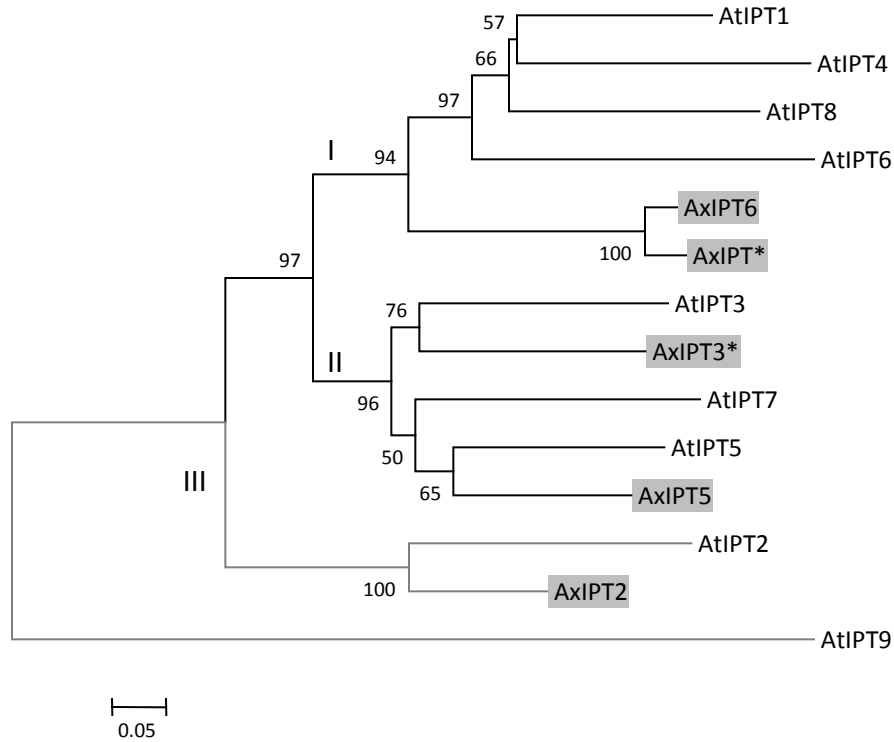

**Figure S2. Phylogenetic tree of IPT.** The unrooted phylogenetic tree of full length protein sequences from *Arabidopsis* and *A. chinensis* aligned using Clustal W. Branch support values from 100 bootstraps are indicated when higher than 50%. Grey boxes indicate *Actinidia* IPT proteins. Grey branches indicate IPTs involved in *cis*-zeatin synthesis.

**Figure S3**

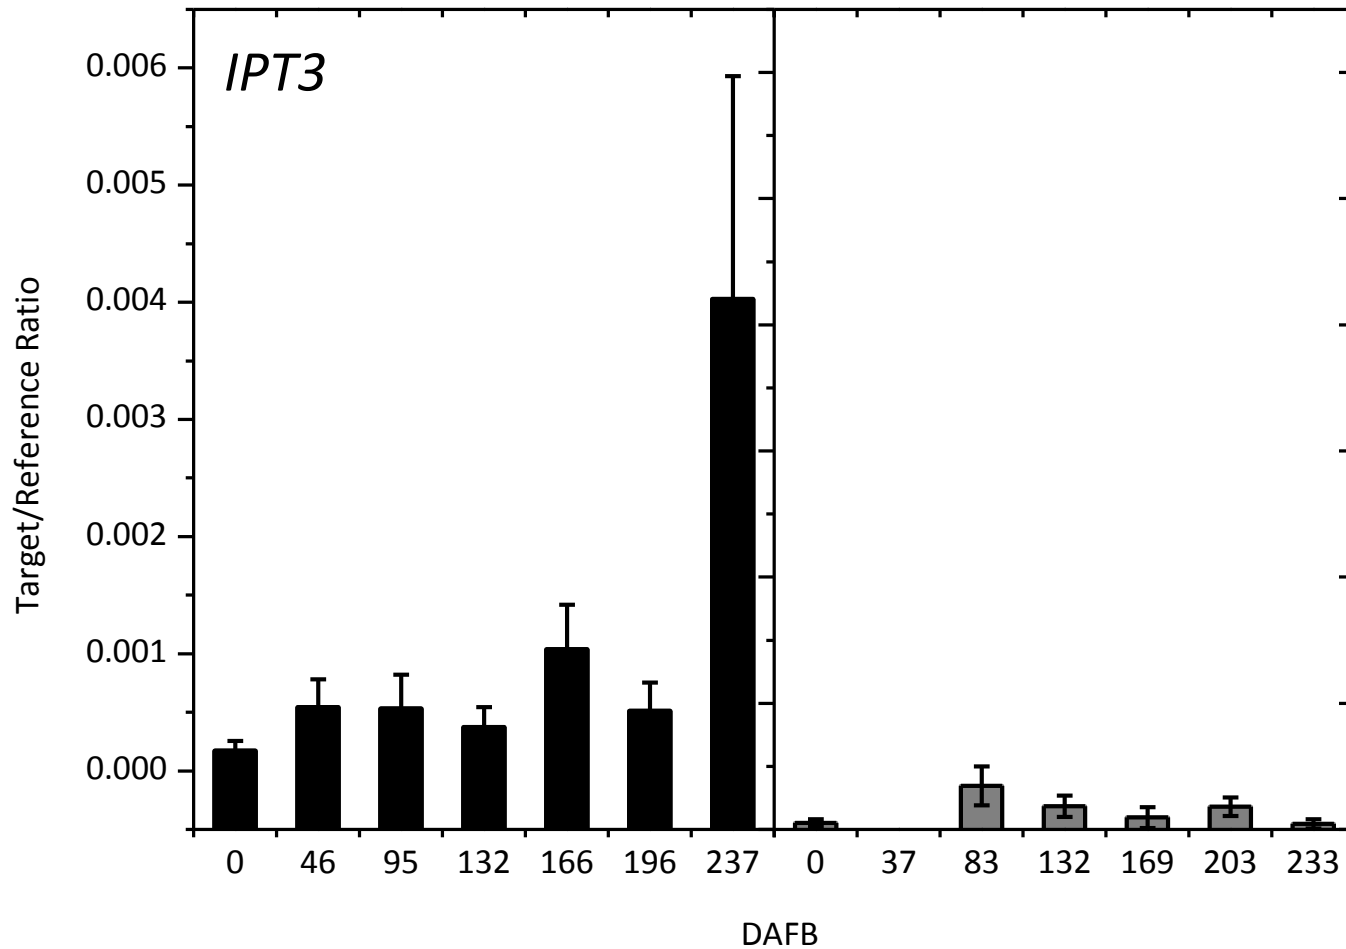

**Figure S3. Expression of cytokinin biosynthetic gene *IPT3* in *A. chinensis* and *A. deliciosa* fruit over development in 2009.** Expression of cytokinin biosynthetic pathway genes in *Actinidia deliciosa* (left panels, black bars) and *A. chinensis* (right panels, grey bars) over fruit development (days after full bloom; DAFB), measured as a target/reference ratio. Error bars indicate standard error (n=4).

Table S1. Concentration of minor cytokinin metabolites in *A. deliciosa* and *A. chinensis* in 2009 and 2010 in pmol/g DW ( $\pm$ SE), (n=3).

|                          | DAFB | Free Bases          |      |                    | Ribosides            |                      |                       | Nucleotides             |                      | Methiols |       |       |        | Glucosides          |                     |      |                      |                      |
|--------------------------|------|---------------------|------|--------------------|----------------------|----------------------|-----------------------|-------------------------|----------------------|----------|-------|-------|--------|---------------------|---------------------|------|----------------------|----------------------|
|                          |      | DZ                  | cisZ | iP                 | DZR                  | cisZR                | iPR                   | DZNT                    | cisZNT               | MeSZ     | MeSiP | MeSZR | MeSiPA | DZOG                | cisZROG             | DZ9G | tZOG                 | tZ9G                 |
| <i>A. chinensis</i> 2009 | 37   | 0.00                | 0.00 | 2.86 ( $\pm$ 0.56) | 3.30 ( $\pm$ 0.36)   | 1.71 ( $\pm$ 0.34)   | 10.24 ( $\pm$ 0.50)   | 10.28 ( $\pm$ 0.73)     | 6.67 ( $\pm$ 0.89)   | 0.00     | 0.00  | 0.00  | 0.00   | 0.00                | 0.00                | 0.00 | 2.67 ( $\pm$ 0.42)   | 20.49 ( $\pm$ 4.73)  |
|                          | 83   | N/D                 | 0.00 | 2.57 ( $\pm$ 1.15) | 1.57 ( $\pm$ 0.76)   | 1.09 ( $\pm$ 0.48)   | 14.24 ( $\pm$ 4.68)   | 9.32 ( $\pm$ 3.73)      | 8.11 ( $\pm$ 2.88)   | 0.00     | 0.00  | 0.00  | 0.00   | 0.00                | 3.89 ( $\pm$ 0.84)  | 0.00 | 0.93 ( $\pm$ 0.39)   | 19.58 ( $\pm$ 6.21)  |
|                          | 132  | N/D                 | 0.00 | 3.32 ( $\pm$ 0.35) | 3.44 ( $\pm$ 0.28)   | 2.58 ( $\pm$ 0.23)   | 188.09 ( $\pm$ 6.33)  | 15.49 ( $\pm$ 0.70)     | N/D                  | 0.00     | 0.00  | 0.00  | 0.00   | 0.00                | 0.20 ( $\pm$ 0.15)  | 0.00 | 3.44 ( $\pm$ 0.18)   | 14.05 ( $\pm$ 0.99)  |
|                          | 169  | N/D                 | 0.00 | 4.34 ( $\pm$ 0.49) | 7.95 ( $\pm$ 0.85)   | 2.61 ( $\pm$ 0.17)   | 167.30 ( $\pm$ 20.83) | 97.34 ( $\pm$ 12.05)    | N/D                  | 0.00     | 0.00  | 0.00  | 0.00   | 1.67 ( $\pm$ 0.06)  | 0.00                | 0.00 | 7.90 ( $\pm$ 0.39)   | 26.26 ( $\pm$ 1.24)  |
|                          | 203  | 2.55 ( $\pm$ 0.94)  | 0.00 | 3.09 ( $\pm$ 0.27) | 7.65 ( $\pm$ 0.94)   | 0.90 ( $\pm$ 0.38)   | 6.27 ( $\pm$ 0.13)    | 417.46 ( $\pm$ 34.13)   | N/D                  | 0.00     | 0.00  | 0.00  | 0.00   | 4.66 ( $\pm$ 0.23)  | 0.00                | 0.00 | 16.83 ( $\pm$ 0.51)  | 53.89 ( $\pm$ 1.32)  |
|                          | 233  | 18.99 ( $\pm$ 0.80) | 0.00 | 2.36 ( $\pm$ 1.19) | 55.67 ( $\pm$ 1.34)  | 3.23 ( $\pm$ 0.48)   | 23.20 ( $\pm$ 0.33)   | 748.67 ( $\pm$ 23.43)   | N/D                  | 0.00     | 0.00  | 0.00  | 0.00   | 26.34 ( $\pm$ 1.84) | 0.00                | 0.00 | 63.24 ( $\pm$ 3.62)  | 148.47 ( $\pm$ 5.78) |
| <i>A. deliciosa</i> 2009 | 46   | 3.66 ( $\pm$ 0.93)  | 0.00 | 0.57 ( $\pm$ 0.08) | N/D                  | 0.87 ( $\pm$ 0.37)   | 5.44 ( $\pm$ 0.43)    | 2.19 ( $\pm$ 0.34)      | 6.12 ( $\pm$ 0.18)   | 0.00     | 0.00  | 0.00  | 0.00   | 0.00                | 26.82 ( $\pm$ 2.86) | 0.00 | 2.06 ( $\pm$ 0.30)   | 10.10 ( $\pm$ 1.05)  |
|                          | 95   | 0.00                | 0.00 | 0.56 ( $\pm$ 0.18) | N/D                  | 1.07 ( $\pm$ 0.20)   | 11.11 ( $\pm$ 7.96)   | 5.72 ( $\pm$ 2.46)      | 13.04 ( $\pm$ 0.39)  | 0.00     | 0.00  | 0.00  | 0.00   | 0.00                | 1.34 ( $\pm$ 0.95)  | 0.00 | 2.46 ( $\pm$ 0.34)   | 4.88 ( $\pm$ 0.29)   |
|                          | 132  | 2.95 ( $\pm$ 0.58)  | 0.00 | 1.39 ( $\pm$ 0.14) | 3.00 ( $\pm$ 0.28)   | 2.57 ( $\pm$ 0.15)   | 30.95 ( $\pm$ 1.66)   | 33.57 ( $\pm$ 0.76)     | N/D                  | 0.00     | 0.00  | 0.00  | 0.00   | 0.00                | 1.00 ( $\pm$ 1.41)  | 0.00 | 12.56 ( $\pm$ 1.74)  | 9.74 ( $\pm$ 0.80)   |
|                          | 166  | 3.83 ( $\pm$ 1.12)  | 0.00 | 1.23 ( $\pm$ 0.20) | 8.24 ( $\pm$ 0.39)   | 2.30 ( $\pm$ 0.43)   | 11.89 ( $\pm$ 1.23)   | 60.91 ( $\pm$ 3.18)     | N/D                  | 0.00     | 0.00  | 0.00  | 0.00   | 1.04 ( $\pm$ 0.23)  | 0.00                | 0.00 | 43.18 ( $\pm$ 2.19)  | 10.39 ( $\pm$ 0.96)  |
|                          | 196  | 3.95 ( $\pm$ 1.58)  | 0.00 | 2.40 ( $\pm$ 0.26) | 33.61 ( $\pm$ 2.29)  | 7.26 ( $\pm$ 0.78)   | 23.01 ( $\pm$ 1.59)   | 204.89 ( $\pm$ 22.99)   | N/D                  | 0.00     | 0.00  | 0.00  | 0.00   | 2.34 ( $\pm$ 0.68)  | 0.00                | 0.00 | 77.35 ( $\pm$ 7.50)  | 14.35 ( $\pm$ 1.82)  |
|                          | 237  | 5.36 ( $\pm$ 0.58)  | 0.00 | 3.32 ( $\pm$ 0.16) | 74.08 ( $\pm$ 1.54)  | 7.77 ( $\pm$ 1.39)   | 36.35 ( $\pm$ 1.65)   | 590.26 ( $\pm$ 15.42)   | N/D                  | 0.00     | 0.00  | 0.00  | 0.00   | 12.66 ( $\pm$ 2.24) | 0.00                | 0.00 | 128.45 ( $\pm$ 1.47) | 28.29 ( $\pm$ 0.27)  |
| <i>A. chinensis</i> 2010 | 48   | 2.40 ( $\pm$ 0.00)  | 0.00 | N/D                | 3.58 ( $\pm$ 0.38)   | 2.34 ( $\pm$ 0.22)   | 12.80 ( $\pm$ 0.75)   | 10.35 ( $\pm$ 0.33)     | 9.58 ( $\pm$ 0.00)   | 0.00     | 0.00  | 0.00  | 0.00   | 0.00                | 0.31 ( $\pm$ 0.13)  | 0.00 | 0.00                 | 12.57 ( $\pm$ 1.29)  |
|                          | 92   | N/D                 | 0.00 | 1.10 ( $\pm$ 0.00) | 3.23 ( $\pm$ 1.23)   | 18.48 ( $\pm$ 23.18) | 57.45 ( $\pm$ 48.16)  | 5.88 ( $\pm$ 1.13)      | 39.70 ( $\pm$ 34.59) | 0.00     | 0.00  | 0.00  | 0.00   | 0.00                | 11.54 ( $\pm$ 0.27) | 0.00 | 2.35 ( $\pm$ 0.57)   | 8.30 ( $\pm$ 0.29)   |
|                          | 137  | 0.00                | 0.00 | 1.05 ( $\pm$ 0.04) | 0.85 ( $\pm$ 0.20)   | 0.76 ( $\pm$ 0.30)   | 20.28 ( $\pm$ 4.74)   | 17.50 ( $\pm$ 1.67)     | N/D                  | 0.00     | 0.00  | 0.00  | 0.00   | 0.77 ( $\pm$ 0.18)  | 0.18 ( $\pm$ 0.16)  | 0.00 | 3.97 ( $\pm$ 0.44)   | 11.24 ( $\pm$ 0.92)  |
|                          | 179  | 0.00                | 0.00 | 1.32 ( $\pm$ 0.19) | 3.95 ( $\pm$ 0.78)   | 1.65 ( $\pm$ 0.15)   | 40.33 ( $\pm$ 12.21)  | 170.63 ( $\pm$ 15.67)   | N/D                  | 0.00     | 0.00  | 0.00  | 0.00   | 1.42 ( $\pm$ 0.18)  | 0.12 ( $\pm$ 0.17)  | 0.00 | 6.35 ( $\pm$ 0.52)   | 24.98 ( $\pm$ 0.24)  |
|                          | 215  | N/D                 | 0.00 | 1.58 ( $\pm$ 0.11) | 9.29 ( $\pm$ 0.37)   | 0.97 ( $\pm$ 0.64)   | 25.41 ( $\pm$ 0.51)   | 412.11 ( $\pm$ 9.46)    | N/D                  | 0.00     | 0.00  | 0.00  | 0.00   | 3.18 ( $\pm$ 0.50)  | 0.00                | 0.00 | 9.84 ( $\pm$ 0.67)   | 49.02 ( $\pm$ 1.79)  |
|                          | 246  | 18.11 ( $\pm$ 2.46) | 0.00 | 0.68 ( $\pm$ 0.25) | 67.67 ( $\pm$ 6.07)  | 3.20 ( $\pm$ 0.29)   | 21.58 ( $\pm$ 2.56)   | 1014.89 ( $\pm$ 102.06) | N/D                  | 0.00     | 0.00  | 0.00  | 0.00   | 32.81 ( $\pm$ 4.20) | 0.00                | 0.00 | 38.13 ( $\pm$ 0.78)  | 84.14 ( $\pm$ 2.64)  |
| <i>A. deliciosa</i> 2010 | 49   | 0.00                | 0.00 | 0.34 ( $\pm$ 0.07) | 1.65 ( $\pm$ 0.30)   | 1.23 ( $\pm$ 0.06)   | 9.51 ( $\pm$ 0.92)    | 8.93 ( $\pm$ 1.58)      | 9.51 ( $\pm$ 1.49)   | 0.00     | 0.00  | 0.00  | 0.00   | 0.44 ( $\pm$ 0.31)  | 8.20 ( $\pm$ 0.48)  | 0.00 | 3.35 ( $\pm$ 0.31)   | 11.08 ( $\pm$ 0.72)  |
|                          | 94   | 0.00                | 0.00 | 0.34 ( $\pm$ 0.08) | 0.54 ( $\pm$ 0.10)   | 1.80 ( $\pm$ 0.36)   | 7.95 ( $\pm$ 3.26)    | 2.79 ( $\pm$ 0.08)      | 19.17 ( $\pm$ 2.08)  | 0.00     | 0.00  | 0.00  | 0.00   | 0.34 ( $\pm$ 0.24)  | 0.84 ( $\pm$ 1.19)  | 0.00 | 3.61 ( $\pm$ 0.44)   | 5.05 ( $\pm$ 0.76)   |
|                          | 136  | 0.00                | 0.00 | 1.23 ( $\pm$ 0.10) | 1.46 ( $\pm$ 0.19)   | 1.40 ( $\pm$ 0.27)   | 21.24 ( $\pm$ 0.40)   | 16.94 ( $\pm$ 2.94)     | N/D                  | 0.00     | 0.00  | 0.00  | 0.00   | 0.24 ( $\pm$ 0.34)  | 0.00                | 0.00 | 12.88 ( $\pm$ 0.50)  | 4.80 ( $\pm$ 0.37)   |
|                          | 172  | 0.00                | 0.00 | 1.60 ( $\pm$ 0.23) | 8.36 ( $\pm$ 3.33)   | 11.10 ( $\pm$ 3.58)  | 40.36 ( $\pm$ 16.30)  | 87.65 ( $\pm$ 35.24)    | N/D                  | 0.00     | 0.00  | 0.00  | 0.00   | 0.92 ( $\pm$ 0.14)  | 0.00                | 0.00 | 39.21 ( $\pm$ 1.98)  | 8.62 ( $\pm$ 0.04)   |
|                          | 203  | 8.28 ( $\pm$ 2.31)  | 0.00 | 1.26 ( $\pm$ 0.30) | 38.88 ( $\pm$ 13.36) | 6.33 ( $\pm$ 1.28)   | 14.66 ( $\pm$ 5.10)   | 325.75 ( $\pm$ 124.72)  | N/D                  | 0.00     | 0.00  | 0.00  | 0.00   | 5.36 ( $\pm$ 0.50)  | 0.00                | 0.00 | 59.41 ( $\pm$ 0.82)  | 15.36 ( $\pm$ 0.29)  |
|                          | 233  | 8.37 ( $\pm$ 0.42)  | 0.00 | 2.24 ( $\pm$ 0.14) | 61.34 ( $\pm$ 2.46)  | 4.80 ( $\pm$ 1.17)   | 16.74 ( $\pm$ 0.86)   | 832.20 ( $\pm$ 15.22)   | 53.34 ( $\pm$ 0.00)  | 0.00     | 0.00  | 0.00  | 0.00   | 26.16 ( $\pm$ 0.74) | 0.00                | 0.00 | 134.81 ( $\pm$ 8.59) | 14.97 ( $\pm$ 1.15)  |
